# Supplementary material
Source: Springer Nature journal article supplement (https://www.springermedizin.de/resource/supplementary/12903_2013_411_MOESM1_ESM.pdf/9516974)
Supplement: MOESM1 [file 9516974]

**Macrosystem** -  
culture, religion

**Exosystem** - community  
level influence, including fairly  
established norms and

**Mesosystem** - schools,  
churches, and sports teams

**Microsystem**  
- family, groups of  
friends, and other  
social contacts

**Good oral  
health for  
children**
